# Supplementary material
Source: PubMed Central journal article supplement (PMC3468924)
Supplement: tlo0505_0327SD1.pdf [file tlo0505_0327SD1.pdf]

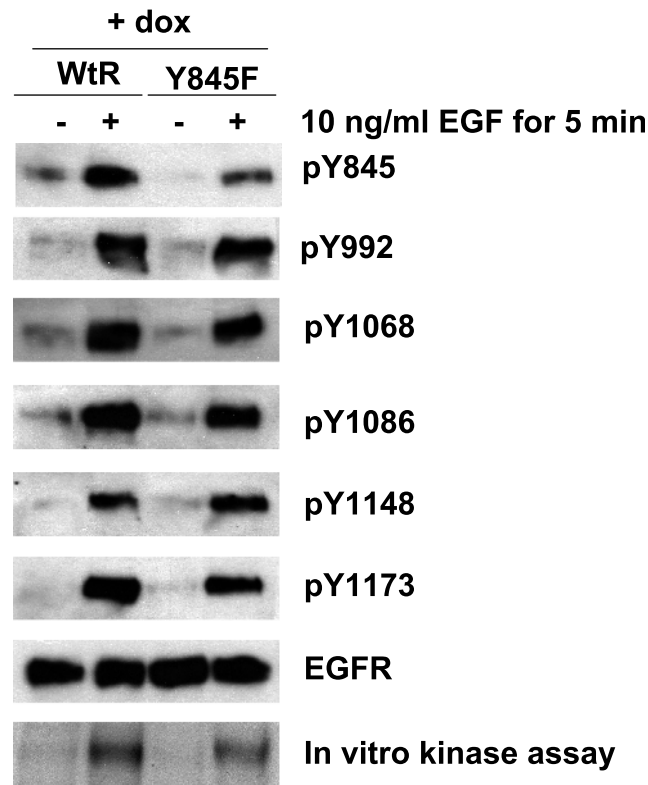

**Figure W1.** EGFR remains phosphorylated in the absence of EGFR tyrosine 845 phosphorylation. MCF7 cells were induced to express wt-EGFR or Y845F-EGFR for 48 hours. Cells were placed in serum-free media for 24 hours and stimulated with 10 ng/ml EGF for 5 minutes. Lysates were prepared, and protein was separated by SDS-PAGE and immunoblotted using pY845-EGFR, pY992-EGFR, pY1068-EGFR, pY1086-EGFR, pY1148-EGFR, pY1173-EGFR, and EGFR antibodies. Additionally, lysates were immunoprecipitated using EGFR antibodies and *in vitro* kinase assays were performed to measure incorporation of phosphate into EGFR.

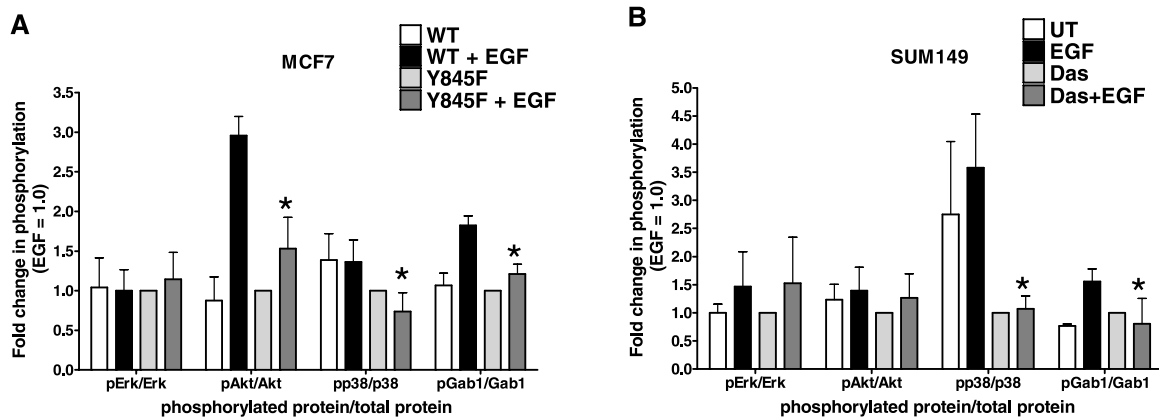

**Figure W2.** Quantification of phospho-immunoblots. Immunoblots were scanned, and the appropriate regions were isolated using Adobe Photoshop. AlphaEaseFC was used to quantify the digitized images. To compare between experiments, we set EGF-treated wt-EGFR or no dasatinib values to 1.0. The relative densitometric values for each phosphorylated protein were divided by the protein expression values. The representative numbers are the average of at least three experiments. Student's *t* test was used to calculate the *P* values. (A) WT + EGF *versus* Y845F + EGF: pAkt/Akt, \**P* = .0488; pp38 MAPK/p38 MAPK, \**P* = .0229; pGab1/Gab1, \**P* = .0359. (B) EGF *versus* Das + EGF: pp38 MAPK/p38 MAPK, \**P* = .0022; pGab1/Gab1, \**P* = .05.
